# Supplementary material for: HLA Allele and Haplotype Frequencies in Three Urban Mexican Populations: Genetic Diversity for the Approach of Genomic Medicine
Source: PubMed Central journal article supplement (PMC7168288; doi:10.3390/diagnostics10010047), 2020-01-16
Supplement: diagnostics-10-00047-s001.pdf [file diagnostics-10-00047-s001.pdf]

**Supplementary Table 1. HLA-A allele frequency from Mexico: Tlalpan, Chihuahua, and Xalapa**

| Allele  | MM       |       | Tlalpan |       | Chihuahua |       | Xalapa |       |
|---------|----------|-------|---------|-------|-----------|-------|--------|-------|
|         | (n= 502) |       | (n=330) |       | (n=88)    |       | (n=84) |       |
|         | n        | AF    | n       | AF    | n         | AF    | n      | AF    |
| A*01:01 | 59       | 5.88  | 40      | 6.06  | 16        | 9.09  | 3      | 1.79  |
| A*02:01 | 265      | 26.39 | 171     | 25.91 | 48        | 27.27 | 46     | 27.38 |
| A*02:02 | 20       | 1.99  | 16      | 2.42  | 1         | 0.57  | 3      | 1.79  |
| A*03:01 | 48       | 4.78  | 29      | 4.39  | 10        | 5.68  | 9      | 5.36  |
| A*11:01 | 27       | 2.69  | 18      | 2.73  | 6         | 3.41  | 3      | 1.79  |
| A*11:04 | 7        | 0.70  | 6       | 0.91  | 1         | 0.57  | 0      | 0.00  |
| A*23:01 | 30       | 2.99  | 18      | 2.73  | 6         | 3.41  | 6      | 3.57  |
| A*24:02 | 165      | 16.43 | 113     | 17.12 | 28        | 15.91 | 24     | 14.29 |
| A*25:01 | 8        | 0.80  | 6       | 0.91  | 2         | 1.14  | 0      | 0.00  |
| A*26:01 | 33       | 3.29  | 19      | 2.88  | 9         | 5.11  | 5      | 2.98  |
| A*29:01 | 29       | 2.89  | 18      | 2.73  | 8         | 4.55  | 3      | 1.79  |
| A*30:01 | 34       | 3.39  | 26      | 3.94  | 4         | 2.27  | 4      | 2.38  |
| A*31:01 | 65       | 6.47  | 34      | 5.15  | 15        | 8.52  | 16     | 9.52  |
| A*31:03 | 1        | 0.10  | 1       | 0.15  | 0         | 0.00  | 0      | 0.00  |
| A*32:01 | 17       | 1.69  | 9       | 1.36  | 4         | 2.27  | 4      | 2.38  |
| A*33:01 | 19       | 1.89  | 13      | 1.97  | 3         | 1.70  | 3      | 1.79  |
| A*34:04 | 3        | 0.30  | 3       | 0.45  | 0         | 0.00  | 0      | 0.00  |
| A*36    | 18       | 1.79  | 10      | 1.52  | 4         | 2.27  | 4      | 2.38  |
| A*66:01 | 3        | 0.30  | 2       | 0.30  | 0         | 0.00  | 1      | 0.60  |
| A*68:01 | 129      | 12.85 | 91      | 13.79 | 8         | 4.55  | 30     | 17.86 |
| A*68:02 | 4        | 0.40  | 2       | 0.30  | 2         | 1.14  | 0      | 0.00  |
| A*68:03 | 10       | 1.00  | 9       | 1.36  | 0         | 0.00  | 1      | 0.60  |
| A*68:05 | 2        | 0.20  | 1       | 0.15  | 0         | 0.00  | 1      | 0.60  |
| A*69:01 | 1        | 0.10  | 1       | 0.15  | 0         | 0.00  | 0      | 0.00  |
| A*74:01 | 5        | 0.50  | 2       | 0.30  | 1         | 0.57  | 2      | 1.19  |

**A\*80:01**    2    0.20    2    0.30    0    0.00    0    0.00

AF: Allele Frequency. Only alleles with. **n**: Refers to the number of the alleles

**Supplementary Table 2.** *HLA-B* allele frequency from Mexico: Tlalpan, Chihuahua, and Xalapa

| Allele         | MM       |       | Tlalpan |       | Chihuahua |       | Xalapa |       |
|----------------|----------|-------|---------|-------|-----------|-------|--------|-------|
|                | (n= 502) |       | (n=330) |       | (n=88)    |       | (n=84) |       |
|                | n        | AF    | n       | AF    | n         | AF    | n      | AF    |
| <b>B*07:02</b> | 47       | 4.68  | 23      | 3.48  | 16        | 9.09  | 8      | 4.76  |
| <b>B*07:05</b> | 1        | 0.10  | 1       | 0.15  | 0         | 0.00  | 0      | 0.00  |
| <b>B*08:01</b> | 30       | 2.99  | 20      | 3.03  | 9         | 5.11  | 1      | 0.60  |
| <b>B*08:04</b> | 1        | 0.10  | 0       | 0.00  | 1         | 0.57  | 0      | 0.00  |
| <b>B*13:01</b> | 12       | 1.20  | 9       | 1.36  | 2         | 1.14  | 1      | 0.60  |
| <b>B*13:02</b> | 1        | 0.10  | 1       | 0.15  | 0         | 0.00  | 0      | 0.00  |
| <b>B*14:01</b> | 24       | 2.39  | 12      | 1.82  | 9         | 5.11  | 3      | 1.79  |
| <b>B*14:02</b> | 25       | 2.49  | 22      | 3.33  | 3         | 1.70  | 0      | 0.00  |
| <b>B*15:01</b> | 54       | 5.38  | 36      | 5.45  | 7         | 3.98  | 11     | 6.55  |
| <b>B*15:02</b> | 10       | 1.00  | 10      | 1.52  | 0         | 0.00  | 0      | 0.00  |
| <b>B*15:03</b> | 8        | 0.80  | 4       | 0.61  | 1         | 0.57  | 3      | 1.79  |
| <b>B*15:05</b> | 4        | 0.40  | 4       | 0.61  | 0         | 0.00  | 0      | 0.00  |
| <b>B*15:09</b> | 1        | 0.10  | 0       | 0.00  | 1         | 0.57  | 0      | 0.00  |
| <b>B*15:17</b> | 1        | 0.10  | 0       | 0.00  | 1         | 0.57  | 0      | 0.00  |
| <b>B*15:30</b> | 1        | 0.10  | 0       | 0.00  | 0         | 0.00  | 1      | 0.60  |
| <b>B*18:01</b> | 25       | 2.49  | 15      | 2.27  | 7         | 3.98  | 3      | 1.79  |
| <b>B*18:07</b> | 2        | 0.20  | 2       | 0.30  | 0         | 0.00  | 0      | 0.00  |
| <b>B*27</b>    | 9        | 0.90  | 6       | 0.91  | 2         | 1.14  | 1      | 0.60  |
| <b>B*35:01</b> | 161      | 16.04 | 109     | 16.52 | 19        | 10.80 | 33     | 19.64 |
| <b>B*35:02</b> | 43       | 4.28  | 28      | 4.24  | 5         | 2.84  | 10     | 5.95  |
| <b>B*35:03</b> | 1        | 0.10  | 0       | 0.00  | 0         | 0.00  | 1      | 0.60  |
| <b>B*35:05</b> | 1        | 0.10  | 1       | 0.15  | 0         | 0.00  | 0      | 0.00  |

|                |     |       |    |       |    |       |    |       |
|----------------|-----|-------|----|-------|----|-------|----|-------|
| <b>B*35:14</b> | 3   | 0.30  | 2  | 0.30  | 1  | 0.57  | 0  | 0.00  |
| <b>B*37:01</b> | 7   | 0.70  | 6  | 0.91  | 0  | 0.00  | 1  | 0.60  |
| <b>B*38:01</b> | 11  | 1.10  | 3  | 0.45  | 6  | 3.41  | 2  | 1.19  |
| <b>B*39:01</b> | 131 | 13.05 | 86 | 13.03 | 20 | 11.36 | 25 | 14.88 |
| <b>B*39:02</b> | 23  | 2.29  | 21 | 3.18  | 1  | 0.57  | 1  | 0.60  |
| <b>B*39:06</b> | 16  | 1.59  | 14 | 2.12  | 1  | 0.57  | 1  | 0.60  |
| <b>B*40:01</b> | 22  | 2.19  | 15 | 2.27  | 5  | 2.84  | 2  | 1.19  |
| <b>B*40:02</b> | 65  | 6.47  | 41 | 6.21  | 7  | 3.98  | 17 | 10.12 |
| <b>B*40:03</b> | 1   | 0.10  | 0  | 0.00  | 0  | 0.00  | 1  | 0.60  |
| <b>B*40:05</b> | 5   | 0.50  | 1  | 0.15  | 1  | 0.57  | 3  | 1.79  |
| <b>B*41:01</b> | 4   | 0.40  | 4  | 0.61  | 0  | 0.00  | 0  | 0.00  |
| <b>B*42:01</b> | 2   | 0.20  | 1  | 0.15  | 1  | 0.57  | 0  | 0.00  |
| <b>B*42:04</b> | 1   | 0.10  | 1  | 0.15  | 0  | 0.00  | 0  | 0.00  |
| <b>B*44:02</b> | 62  | 6.18  | 39 | 5.91  | 14 | 7.95  | 9  | 5.36  |
| <b>B*45:01</b> | 7   | 0.70  | 5  | 0.76  | 2  | 1.14  | 0  | 0.00  |
| <b>B*45:02</b> | 3   | 0.30  | 3  | 0.45  | 0  | 0.00  | 0  | 0.00  |
| <b>B*46:01</b> | 1   | 0.10  | 1  | 0.15  | 0  | 0.00  | 0  | 0.00  |
| <b>B*48:01</b> | 32  | 3.19  | 26 | 3.94  | 1  | 0.57  | 5  | 2.98  |
| <b>B*49:01</b> | 13  | 1.29  | 9  | 1.36  | 1  | 0.57  | 3  | 1.79  |
| <b>B*49:02</b> | 3   | 0.30  | 3  | 0.45  | 0  | 0.00  | 0  | 0.00  |
| <b>B*50:01</b> | 11  | 1.10  | 8  | 1.21  | 3  | 1.70  | 0  | 0.00  |
| <b>B*51:01</b> | 65  | 6.47  | 36 | 5.45  | 21 | 11.93 | 8  | 4.76  |
| <b>B*51:02</b> | 1   | 0.10  | 0  | 0.00  | 0  | 0.00  | 1  | 0.60  |
| <b>B*52:01</b> | 16  | 1.59  | 8  | 1.21  | 4  | 2.27  | 4  | 2.38  |
| <b>B*52:02</b> | 2   | 0.20  | 1  | 0.15  | 1  | 0.57  | 0  | 0.00  |
| <b>B*53:01</b> | 11  | 1.10  | 7  | 1.06  | 0  | 0.00  | 4  | 2.38  |
| <b>B*54:01</b> | 1   | 0.10  | 1  | 0.15  | 0  | 0.00  | 0  | 0.00  |
| <b>B*55:01</b> | 6   | 0.60  | 6  | 0.91  | 0  | 0.00  | 0  | 0.00  |
| <b>B*55:02</b> | 1   | 0.10  | 0  | 0.00  | 1  | 0.57  | 0  | 0.00  |
| <b>B*56:01</b> | 1   | 0.10  | 1  | 0.15  | 0  | 0.00  | 0  | 0.00  |

---

|                |   |      |   |      |   |      |   |      |
|----------------|---|------|---|------|---|------|---|------|
| <b>B*57:01</b> | 6 | 0.60 | 5 | 0.76 | 0 | 0.00 | 1 | 0.60 |
| <b>B*57:02</b> | 2 | 0.20 | 2 | 0.30 | 0 | 0.00 | 0 | 0.00 |
| <b>B*58:01</b> | 6 | 0.60 | 1 | 0.15 | 2 | 1.14 | 3 | 1.79 |
| <b>B*78:01</b> | 1 | 0.10 | 0 | 0.00 | 0 | 0.00 | 1 | 0.60 |

AF: Allele Frequency. Only alleles with. n: Refers to the number of alleles.

**Supplementary Table 3.** HLA-DRB1 allele frequency from Mexico: Talpan, Chihuahua, and Xalapa

| Allele            | MM       |       | Talpan  |       | Chihuahua |       | Xalapa |       |
|-------------------|----------|-------|---------|-------|-----------|-------|--------|-------|
|                   | (n= 502) |       | (n=330) |       | (n=88)    |       | (n=84) |       |
|                   | n        | AF    | n       | AF    | n         | AF    | n      | AF    |
| <b>DRB1*01:01</b> | 35       | 3.49  | 23      | 3.48  | 9         | 5.11  | 3      | 1.79  |
| <b>DRB1*01:02</b> | 29       | 2.89  | 22      | 3.33  | 6         | 3.41  | 1      | 0.60  |
| <b>DRB1*01:03</b> | 4        | 0.40  | 2       | 0.30  | 0         | 0.00  | 2      | 1.19  |
| <b>DRB1*03:01</b> | 49       | 4.88  | 36      | 5.45  | 11        | 6.25  | 2      | 1.19  |
| <b>DRB1*03:02</b> | 2        | 0.20  | 1       | 0.15  | 0         | 0.00  | 1      | 0.60  |
| <b>DRB1*03:03</b> | 3        | 0.30  | 3       | 0.45  | 0         | 0.00  | 0      | 0.00  |
| <b>DRB1*04:01</b> | 13       | 1.29  | 10      | 1.52  | 2         | 1.14  | 1      | 0.60  |
| <b>DRB1*04:02</b> | 16       | 1.59  | 10      | 1.52  | 2         | 1.14  | 4      | 2.38  |
| <b>DRB1*04:03</b> | 24       | 2.39  | 19      | 2.88  | 2         | 1.14  | 3      | 1.79  |
| <b>DRB1*04:04</b> | 66       | 6.57  | 38      | 5.76  | 13        | 7.39  | 15     | 8.93  |
| <b>DRB1*04:05</b> | 13       | 1.29  | 13      | 1.97  | 0         | 0.00  | 0      | 0.00  |
| <b>DRB1*04:07</b> | 174      | 17.33 | 110     | 16.67 | 18        | 10.23 | 46     | 27.38 |
| <b>DRB1*04:08</b> | 1        | 0.10  | 0       | 0.00  | 0         | 0.00  | 1      | 0.60  |
| <b>DRB1*04:10</b> | 2        | 0.20  | 2       | 0.30  | 0         | 0.00  | 0      | 0.00  |
| <b>DRB1*04:11</b> | 17       | 1.69  | 8       | 1.21  | 2         | 1.14  | 7      | 4.17  |
| <b>DRB1*04:13</b> | 2        | 0.20  | 0       | 0.00  | 2         | 1.14  | 0      | 0.00  |
| <b>DRB1*07:01</b> | 74       | 7.37  | 53      | 8.03  | 15        | 8.52  | 6      | 3.57  |
| <b>DRB1*07:05</b> | 1        | 0.10  | 1       | 0.15  | 0         | 0.00  | 0      | 0.00  |

|                   |     |      |    |       |    |      |    |      |
|-------------------|-----|------|----|-------|----|------|----|------|
| <b>DRB1*07:08</b> | 1   | 0.10 | 0  | 0.00  | 0  | 0.00 | 1  | 0.60 |
| <b>DRB1*08:01</b> | 7   | 0.70 | 4  | 0.61  | 1  | 0.57 | 2  | 1.19 |
| <b>DRB1*08:02</b> | 100 | 9.96 | 73 | 11.06 | 13 | 7.39 | 14 | 8.33 |
| <b>DRB1*08:04</b> | 2   | 0.20 | 1  | 0.15  | 1  | 0.57 | 0  | 0.00 |
| <b>DRB1*08:10</b> | 2   | 0.20 | 2  | 0.30  | 0  | 0.00 | 0  | 0.00 |
| <b>DRB1*09:01</b> | 6   | 0.60 | 5  | 0.76  | 1  | 0.57 | 0  | 0.00 |
| <b>DRB1*10:01</b> | 13  | 1.29 | 9  | 1.36  | 3  | 1.70 | 1  | 0.60 |
| <b>DRB1*11:01</b> | 36  | 3.59 | 27 | 4.09  | 7  | 3.98 | 2  | 1.19 |
| <b>DRB1*11:02</b> | 5   | 0.50 | 3  | 0.45  | 1  | 0.57 | 1  | 0.60 |
| <b>DRB1*11:04</b> | 13  | 1.29 | 6  | 0.91  | 3  | 1.70 | 4  | 2.38 |
| <b>DRB1*12:01</b> | 6   | 0.60 | 2  | 0.30  | 3  | 1.70 | 1  | 0.60 |
| <b>DRB1*13:01</b> | 33  | 3.29 | 20 | 3.03  | 7  | 3.98 | 6  | 3.57 |
| <b>DRB1*13:02</b> | 10  | 1.00 | 7  | 1.06  | 1  | 0.57 | 2  | 1.19 |
| <b>DRB1*13:03</b> | 10  | 1.00 | 6  | 0.91  | 4  | 2.27 | 0  | 0.00 |
| <b>DRB1*13:04</b> | 1   | 0.10 | 1  | 0.15  | 0  | 0.00 | 0  | 0.00 |
| <b>DRB1*13:05</b> | 2   | 0.20 | 1  | 0.15  | 1  | 0.57 | 0  | 0.00 |
| <b>DRB1*13:10</b> | 3   | 0.30 | 0  | 0.00  | 2  | 1.14 | 1  | 0.60 |
| <b>DRB1*13:16</b> | 1   | 0.10 | 0  | 0.00  | 1  | 0.57 | 0  | 0.00 |
| <b>DRB1*14:01</b> | 15  | 1.49 | 3  | 0.45  | 9  | 5.11 | 3  | 1.79 |
| <b>DRB1*14:02</b> | 49  | 4.88 | 29 | 4.39  | 9  | 5.11 | 11 | 6.55 |
| <b>DRB1*14:04</b> | 2   | 0.20 | 2  | 0.30  | 0  | 0.00 | 0  | 0.00 |
| <b>DRB1*14:06</b> | 51  | 5.08 | 37 | 5.61  | 11 | 6.25 | 3  | 1.79 |
| <b>DRB1*15:01</b> | 47  | 4.68 | 28 | 4.24  | 12 | 6.82 | 7  | 4.17 |
| <b>DRB1*15:02</b> | 11  | 1.10 | 9  | 1.36  | 0  | 0.00 | 2  | 1.19 |
| <b>DRB1*15:03</b> | 3   | 0.30 | 1  | 0.15  | 0  | 0.00 | 2  | 1.19 |
| <b>DRB1*15:06</b> | 1   | 0.10 | 0  | 0.00  | 1  | 0.57 | 0  | 0.00 |
| <b>DRB1*16:01</b> | 6   | 0.60 | 6  | 0.91  | 0  | 0.00 | 0  | 0.00 |
| <b>DRB1*16:02</b> | 43  | 4.28 | 27 | 4.09  | 3  | 1.70 | 13 | 7.74 |

---

AF: Allele Frequency. Only alleles with. n: Refers to the number of alleles.

**Supplementary Table 4.** *HLA-DQB1* allele frequency from Mexico: Tlalpan, Chihuahua, and Xalapa

| Allele     | MM       |       | Tlalpan |       | Chihuahua |       | Xalapa |       |
|------------|----------|-------|---------|-------|-----------|-------|--------|-------|
|            | (n= 502) |       | (n=330) |       | (n=88)    |       | (n=84) |       |
|            | n        | AF    | n       | AF    | n         | AF    | n      | AF    |
| DQB1*02:01 | 78       | 7.77  | 59      | 8.94  | 14        | 7.95  | 5      | 2.98  |
| DQB1*02:02 | 55       | 5.48  | 36      | 5.45  | 16        | 9.09  | 3      | 1.79  |
| DQB1*03:01 | 222      | 22.11 | 145     | 21.97 | 43        | 24.43 | 34     | 20.24 |
| DQB1*03:02 | 316      | 31.47 | 202     | 30.61 | 40        | 22.73 | 74     | 44.05 |
| DQB1*03:03 | 6        | 0.60  | 4       | 0.61  | 0         | 0.00  | 2      | 1.19  |
| DQB1*03:04 | 6        | 0.60  | 4       | 0.61  | 0         | 0.00  | 2      | 1.19  |
| DQB1*04:02 | 118      | 11.75 | 82      | 12.42 | 14        | 7.95  | 22     | 13.10 |
| DQB1*04:03 | 1        | 0.10  | 0       | 0.00  | 1         | 0.57  | 0      | 0.00  |
| DQB1*05:01 | 91       | 9.06  | 62      | 9.39  | 21        | 11.93 | 8      | 4.76  |
| DQB1*05:02 | 3        | 0.30  | 2       | 0.30  | 0         | 0.00  | 1      | 0.60  |
| DQB1*05:03 | 3        | 0.30  | 0       | 0.00  | 3         | 1.70  | 0      | 0.00  |
| DQB1*06:01 | 29       | 2.89  | 19      | 2.88  | 4         | 2.27  | 6      | 3.57  |
| DQB1*06:02 | 36       | 3.59  | 22      | 3.33  | 10        | 5.68  | 4      | 2.38  |
| DQB1*06:03 | 31       | 3.09  | 16      | 2.42  | 10        | 5.68  | 5      | 2.98  |
| DQB1*06:04 | 6        | 0.60  | 5       | 0.76  | 0         | 0.00  | 1      | 0.60  |
| DQB1*06:09 | 3        | 0.30  | 2       | 0.30  | 0         | 0.00  | 1      | 0.60  |

AF: Allele Frequency. Only alleles with. n: Refers to the number of alleles.

**Supplementary Table 5:** *HLA-A-B-DRB1-DQB1* haplotypes of the three regions from Mexico

| Tlalpan                               | n=(2n=660) | HF (%) | $\Delta'$ |
|---------------------------------------|------------|--------|-----------|
| A*02:01-B*35:01-DRB1*08:02-DQB1*04:02 | 13         | 1.97   | 0.2209    |
| A*68:01-B*39:01-DRB1*04:07-DQB1*03:02 | 13         | 1.97   | 0.2389    |
| A*68:01-B*39:01-DRB1*08:02-DQB1*04:02 | 10         | 1.52   | 0.1935    |
| A*01:01-B*08:01-DRB1*03:01-DQB1*02:01 | 7          | 1.06   | 0.8678    |
| A*02:01-B*35:01-DRB1*04:07-DQB1*03:02 | 7          | 1.06   | 0.0026    |
| Chihuahua                             | n=(2n=176) | HF (%) | $\Delta'$ |
| A*01:01-B*08:01-DRB1*03:01-DQB1*02:01 | 4          | 2.27   | 0.6444    |
| A*24:02-B*39:01-DRB1*04:07-DQB1*03:02 | 3          | 1.70   | 0.5572    |
| A*01:01-B*14:01-DRB1*01:02-DQB1*05:01 | 2          | 1.14   | 0.3788    |
| A*02:01-B*51:01-DRB1*14:06-DQB1*03:01 | 2          | 1.14   | 0.2472    |
| A*03:01-B*07:02-DRB1*15:01-DQB1*06:02 | 2          | 1.14   | 0.4731    |
| A*02:01-B*51:01-DRB1*01:01-DQB1*05:01 | 2          | 1.14   | 0.2472    |
| A*29:01-B*44:02-DRB1*07:01-DQB1*02:02 | 2          | 1.14   | 0.4601    |
| Xalapa                                | n=(2n=168) | H.F.   | $\Delta'$ |
| A*24:02-B*35:01-DRB1*04:07-DQB1*03:02 | 5          | 2.98   | 0.6098    |
| A*02:01-B*35:01-DRB1*04:07-DQB1*03:02 | 4          | 2.38   | 0.0544    |
| A*02:01-B*35:01-DRB1*08:02-DQB1*04:02 | 4          | 2.38   | 0.2448    |
| A*68:01-B*39:01-DRB1*04:07-DQB1*03:02 | 3          | 1.79   | 0.2195    |
| A*02:01-B*35:02-DRB1*04:07-DQB1*03:02 | 3          | 1.79   | 0.6585    |
| A*31:01-B*39:01-DRB1*08:02-DQB1*04:02 | 2          | 1.19   | 0.4545    |
| A*68:01-B*40:02-DRB1*04:07-DQB1*03:02 | 2          | 1.19   | 0.5447    |
| A*24:02-B*35:01-DRB1*14:02-DQB1*03:01 | 2          | 1.19   | 0.2453    |
| A*68:01-B*35:01-DRB1*04:04-DQB1*03:02 | 2          | 1.19   | 0.1818    |
| A*02:01-B*40:02-DRB1*04:07-DQB1*03:02 | 2          | 1.19   | 0.3171    |

HF: Haplotype frequency. Only haplotypes with HF  $\geq$  1.0% are included in this table.  $\Delta'$ : Standardized linkage disequilibrium. n: Refers to the number of individuals analyzed.
